# Supplementary material
Source: publisher figshare collection journal article supplement (https://gsajournals.figshare.com/ndownloader/files/14387609)
Supplement: Supplementary file 1 [file 14387609]

## Sheet: Table S7
Table S7. The identity of 2,307 SNP markers within accessions.
Accession	Individuals	Identity
BGV006129	2	1
BGV006187	2	1
BGV006327	2	1
BGV006328	2	1
BGV006331	2	1
BGV006333	2	1
BGV006336	2	1
BGV006341	2	1
BGV006343	2	1
BGV006344	2	1
BGV006345	2	1
BGV006347	2	1
BGV006360	2	1
BGV006369	2	1
BGV006370	2	1
BGV006452	2	1
BGV006457	2	1
BGV006468	2	1
BGV006476	2	1
BGV006478	2	1
BGV006484	2	1
BGV006492	2	1
BGV006504	2	1
BGV006507	2	1
BGV006514	2	1
BGV006639	2	1
BGV006640	2	1
BGV006642	2	1
BGV006690	2	1
BGV006691	2	1
BGV006712	2	1
BGV007095	2	1
BGV007100	2	1
BGV007104	2	1
BGV007109	2	1
BGV007111	2	1
BGV007137	2	1
BGV007145	2	1
BGV007151	2	1
BGV007155	2	1
BGV007161	2	1
BGV007168	2	1
BGV007208	2	1
BGV007222	2	1
BGV007225	2	1
BGV007348	2	1
BGV007355	2	1
BGV007366	2	1
BGV007946	2	1
BGV007947	2	1
BGV015381	2	1
BGV015382	2	1
LA0373	2	0.756288
LA0400	2	0.910245
LA0722	2	1
LA121_1	2	1
LA1269	3	0.949718
LA1301	3	0.987842
LA1371	2	0.97961
LA1429	3	0.97046
LA1478	2	0.710755
LA1547	4	0.558734
LA1578	2	1
LA1582	3	0.805507
LA1589	3	0.980366
LA1617	2	1
LA1689	3	0.89974
LA1923	2	1
LA1936	2	1
LA2093	2	1
LA2181	3	0.662186
LA2184	2	1
LA2188	2	1
LA2533	3	0.99305
LA2725	2	1
LA2854	2	1
PI 128216	2	1
PI 365914	2	1
